1 **Cortical sensorimotor activity in the execution and suppression of discrete and rhythmic**  
2 **movements**

3

4 Mario Hervault<sup>1\*</sup>, Pier–Giorgio Zanone<sup>1</sup>, Jean–Christophe Buisson<sup>2</sup>, Raoul Huys<sup>1</sup>

5 <sup>1</sup>Centre de Recherche Cerveau et Cognition – UMR 5549 CNRS – Université Toulouse 3 Paul

6 Sabatier

7 <sup>2</sup> Institut de Recherche en Informatique de Toulouse – UMR 5505 CNRS – Université Toulouse 3

8 Paul Sabatier

9

10 **\*Corresponding author:**

11 Mario Hervault

12 CNRS CERCO UMR 5549, Pavillon Baudot CHU Purpan, BP 25202 - 31052 TOULOUSE CEDEX

13 [mario.hervault@cnrs.fr](mailto:mario.hervault@cnrs.fr)

14

15 **Competing interests**

16 The author(s) declare no competing interests.

17

18 **Author Contributions**

19 M.H., PG.Z., JC.B. and R.H. are responsible for the study concept and design. M.H. acquired the  
20 data. The analysis and interpretation of data were carried out by M.H., PG.Z. and R.H. The  
21 manuscript was drafted by M.H., PG.Z. and R.H. All authors gave approval of the final submitted  
22 version.

23 **Abstract**

24 Although the engagement of sensorimotor cortices in movement is well documented, the func-  
25 tional relevance of brain activity patterns remains ambiguous. Especially, the cortical engagement  
26 specific to the pre-, within-, and post-movement periods is poorly understood. The present study  
27 addressed this issue by examining sensorimotor EEG activity during the performance as well as  
28 STOP-signal cued suppression of movements pertaining to two distinct classes, namely, discrete  
29 vs. ongoing rhythmic movements. Our findings indicate that the lateralized readiness potential  
30 (LRP), which is classically used as a marker of pre-movement processing, indexes multiple pre-  
31 and in- movement-related brain dynamics in a movement-class dependent fashion. In- and post-  
32 movement event-related (de)synchronization (ERD/ERS) observed in the Mu (8-13 Hz) and Beta  
33 (15-30 Hz) frequency ranges were associated with estimated brain sources in both motor and  
34 somatosensory cortical areas. Notwithstanding, Beta ERS occurred earlier following cancelled  
35 than actually performed movements. In contrast, Mu power did not vary. Whereas Beta power  
36 may reflect the evaluation of the sensory predicted outcome, Mu power might engage in linking  
37 perception to action. Additionally, the rhythmic movement forced stop (only) showed a post-  
38 movement Mu/Beta rebound, which might reflect an active "clearing-out" of the motor plan and  
39 its feedback-based online control. Overall, the present study supports the notion that sensorimo-  
40 tor EEG modulations are key markers to investigate control or executive processes, here initiation  
41 and inhibition, which are exerted when performing distinct movement classes.

42 **Keywords**

43 PMBR, inhibitory control, oscillations, time-frequency, source localization

#### 44 Introduction

45 It has long been known that when performing a voluntary action, cortical sensorimotor  
46 areas are engaged in movement planning, execution and online control <sup>1</sup>. Most corresponding  
47 accumulated knowledge has been acquired in the context of the generation of discrete move-  
48 ment, which constitute an important, but not sole class of movements that humans can perform  
49 <sup>2</sup>. Consequently, two aspects of action control and its neural sensorimotor underpinnings are  
50 strongly under-represented. On the one hand, we know little about cortical sensorimotor engage-  
51 ment related to movement suppression, even though both movement generation *and* suppres-  
52 sion are commonplace in our interaction with the environment <sup>3</sup>. On the other hand, previous  
53 investigations of neural activity when suppressing movements have focused exclusively on short-  
54 lived discrete movements and have then ignored the case of *ongoing-rhythmic* movement sup-  
55 pression, which is also crucial in action control <sup>4-7</sup>. The few studies at hand on sensorimotor activ-  
56 ity related to action suppression have dealt with prepared discrete movements <sup>8-11</sup>, discrete  
57 movements sequence <sup>12,13</sup> or isometric force exertion <sup>14,15</sup>. Kinematically, discrete actions are de-  
58 limited by moments without movement (i.e., with zero velocity and acceleration), such as grasp-  
59 ing an object. In contrast, continuous actions, such as walking, lack recognizable endpoints and  
60 are typically considered rhythmic if they constitute (periodic) repetitions of particular events <sup>2</sup>.  
61 Motor control encompasses both action classes, which differ not only regarding their kinematics  
62 <sup>16</sup> but also in terms of movement dynamics and control processes <sup>17,18</sup>, as well as of corresponding  
63 brain engagement <sup>19</sup>. Indeed, the neural structures associated with controlling discrete and rhyth-  
64 mic actions differ considerably <sup>19-21</sup>, due to different timing and initiation mechanisms <sup>17,20</sup>. Addi-  
65 tionally, integrating in- and post-movement sensory information shows distinct dynamics be-  
66 tween discrete and rhythmic action classes <sup>22,23</sup>, which may involve open- and closed-loop control,  
67 respectively. As sensorimotor EEG activity has been linked to movement-related sensory integra-  
68 tion in the framework of forward internal models of motor control (see below), its investigation  
69 and comparison in both movement classes appears to be crucial.

70 The present study aims to help providing a more complete picture of the cortical sen-  
71 sorimotor activity underlying action control through the study of both the performance *and* sup-  
72 pression of movements belonging to two fundamentally distinct classes, discrete *and* rhythmic  
73 movements. EEG activity over sensorimotor areas was analyzed in terms of the lateralized readi-  
74 ness potential (LRP) and event-related (de)synchronization (ERS/D) of Mu (8 - 13 Hz) and Beta (15

75 - 30 Hz) cortical oscillations. In addition, a second objective was to provide new insights into un-  
76 derstanding the functional relevance of these movement-related neural sensorimotor activities  
77 with regard to action executive control.

78         Prior work has established standard non-invasive methods to explore movement-related  
79 brain activity. When recording scalp EEG, the LRP is believed to reflect the central response prep-  
80 aration within the primary motor cortex (M1) that control the movement <sup>24</sup>. As for brain oscilla-  
81 tions, a well-defined pattern of activity has been described during and after movement execution  
82 in Mu and Beta rhythms. This pattern is characterized by an ERD associated with the movement's  
83 execution, followed by an ERS subsequent to the movement stop <sup>25</sup>. This ERD/ERS pattern has  
84 been recorded over sensorimotor areas for several (contrasting) movement conditions, including  
85 self-paced and stimulus-triggered movements <sup>26,27</sup>, real and imagined movements <sup>28</sup>, as well as  
86 discrete short responses and lasting rhythmic movements <sup>29,30</sup>. Especially, the cortical ERD/ERS  
87 dynamics were clearly observed for each movement cycle in the case of low-frequency movement  
88 repetition (< 1 Hz), that is, when the repetition was most likely due to a concatenation of discrete  
89 movements. In contrast, it transformed into a sustained ERD during higher-frequency movement  
90 repetition, that is, when the movements were truly rhythmic <sup>30-32</sup>.

91         Despite the large number of studies reporting these movement-related neurophysiologi-  
92 cal modulations, their functional relevance remains debated. The LRP is thought to reflect the pre-  
93 movement M1 engagement as a final pathway for the central generation of movement, that is,  
94 the downstream specification of commands to the peripheral motor structures <sup>33</sup>. Accordingly,  
95 LRP is massively used as an index of movement initiation when triggering discrete movement  
96 across multiple simple and choice reaction time tasks <sup>34,35</sup>. In this context, LRP may follow a fixed-  
97 threshold dynamics, that is, the reaching a threshold activation amplitude determines whether  
98 the response will be triggered or not <sup>36,37</sup>. Based on the assumption that the reach of this threshold  
99 discriminates successfully from failed cancellations of a prepared discrete movement <sup>33</sup>, LRP has  
100 become a popular tool for investigating discrete action inhibition <sup>38-41</sup>. When performing a con-  
101 tinuous action, an external signal may indicate the performer to speed up <sup>42</sup>, continue <sup>43</sup> or stop  
102 <sup>6,12,42</sup> the ongoing action. In such cases, a new command specification might engage in the building  
103 up of the motor activity. However, the purported assignment of LRP to pre-movement processing  
104 has led to its dereliction for investigating the voluntary modulation or suppression of an ongoing

105 rhythmic movement. Indeed, the very possibility of an LRP reduction has been ignored by the few  
106 studies exploring rhythmic movement stopping <sup>7,43</sup>.

107         The Mu/Beta ERD reflects the desynchronization of an ensemble of cortical neurons over  
108 sensorimotor brain areas. In contrast, the post-movement Mu/Beta ERS reflects its neural resyn-  
109 chronization <sup>44</sup>. The Mu/Beta activity has been initially suggested to echo a cortical idling state  
110 during "mental inactivity" <sup>45</sup> or a "status quo" in maintaining the current sensorimotor or cognitive  
111 state <sup>46</sup>. Although Mu and Beta tend to follow a similar pattern of activity and can be mapped to  
112 a single dipole due to an overlap in their cortical sources, recent evidence showed that they index  
113 distinct neurological functions <sup>47</sup>. These functions, which are still debated, have been proposed in  
114 the framework of forward internal models of motor control <sup>48</sup>, in which the sensory consequences  
115 of movement are predicted (through forward models) and compared to the actual sensory out-  
116 come. Indeed, the Mu rhythm has been considered as an alpha-like oscillation engaged in a "dif-  
117 fuse and distributed alpha system", in reference to the multiple ~10 Hz rhythms originating from  
118 independent brain sources <sup>49</sup>. Within this broad alpha system, the Mu rhythm might reflect a per-  
119 ception-to-action translation <sup>47,50</sup>. Accordingly, Mu synchronicity occurs when visual and auditory  
120 representations are converted into action-based representations. The potential distinction be-  
121 tween sub-frequencies bands <sup>47</sup> and the Mu involvement in inverse models <sup>51</sup> is still examined. At  
122 any rate, the Mu rhythm is generally viewed as a correlate of the reciprocal interaction between  
123 motor and sensory cortices, this interaction being crucial in the internal models controlling the  
124 action.

125         According to recent reviews <sup>47,52</sup>, the Beta ERD reflects movement preparation, including  
126 the adjustments of motor commands and the anticipation of errors <sup>53</sup>. The Beta ERD modulation  
127 by movement uncertainty <sup>54</sup> also suggests that it plays a role in predicting the sensory conse-  
128 quences of the action. The observation of an above-baseline ERS following movement, known as  
129 the post-movement Beta rebound (PMBR), led to multiple hypotheses. Beta oscillations could re-  
130 flect the post-movement processing of sensory reafference <sup>55</sup>. Indeed, the occurrence of PMBR  
131 after passive movements <sup>56</sup> or when accompanying peripheral nerve stimulation <sup>57</sup> is consistent  
132 with the idea that PMBR originates in sensory feedback to the motor cortices. More specifically,  
133 the PMBR was proposed to index the integration of sensory feedback to evaluate movement out-  
134 come, with any deviation from the forward-predicted outcome leading to an update of the motor  
135 plan <sup>47</sup>. Alternatively, PMBR could reflect the active inhibition of the motor cortex to terminate a

136 movement<sup>58</sup>. The observation of a single PMBR following a sequence of discrete movements<sup>13,59</sup>  
137 and its association to movement parameters such as accuracy, variability, and rate of force devel-  
138 opment<sup>60,61</sup> have been taken as an argument for its involvement in the active inhibition of the  
139 motor cortex following movement termination.

140 All in all, multiple interpretations have been put forth to explain neural sensorimotor ac-  
141 tivity before, during and after a movement. Additionally, in relation to the ERD/ERS pattern, the  
142 brain activation found over both pre- (motor) and post-Rolandic (somatosensory) areas<sup>50,52,62</sup>  
143 contributes to blur the numerous functional hypotheses. Still, experiments requiring both initia-  
144 tion and suppression of movement have tried to provide new insight into the functionality of the  
145 sensorimotor ERD/ERS by showing that its occurrence depends on whether a movement is actu-  
146 ally performed versus withheld<sup>11</sup>. The cortical activity also differed between normal movement  
147 completion and forced suppression<sup>12</sup> and between quick and slow movement termination<sup>14</sup>.  
148 However, the characterization of the movement-related sensorimotor activity suffers from large  
149 variation in the task parameters employed across studies (e.g., task duration and movement am-  
150 plitude), which alters the corresponding neural activity, and has hampered the establishment of  
151 convincing functional interpretations<sup>15</sup>.

152 To complement our understanding of the movement-related neural sensorimotor activ-  
153 ity, the present study examined EEG activity when performing a movement and suppressing it.  
154 EEG was recorded in the context of two fundamental classes of movement: discrete and rhythmic  
155 ones. Using a graphic tablet, we asked participants to initiate a discrete movement after a GO  
156 stimulus and pursue a rhythmic movement after a CONTINUE stimulus. Infrequently, a STOP signal  
157 following the primary stimulus indicated participants to cancel the prepared-discrete movement  
158 or to stop the ongoing-rhythmic one. Firstly, in line with the interpretation of LRP as a sign of  
159 movement preparation, we hypothesized its large amplitude following a GO stimulus to contrast  
160 with its absence following a CONTINUE stimulus, and the STOP signal occurrence to reduce its  
161 amplitude in the discrete experiment only. Secondly, following the assumption that Mu and Beta  
162 rhythms encode reciprocal interactions between motor and sensory cortices to enable monitoring  
163 of movement, we expected to observe a sustained Mu ERD during ongoing rhythmic movement  
164<sup>30</sup>, reflecting the closed-loop processing of sensory information in the CONTINUE condition, and it  
165 to be aborted by movement suppression in the STOP condition. In contrast, we expected to indif-

166 ferently observe a transient Mu ERD/ERS in discrete completed, successfully cancelled, and un-  
167 successfully cancelled actions, as the movement is controlled in an open-loop fashion, and to ob-  
168 serve a transient and sustained Beta ERD, reflecting motor activation, in the discrete and rhythmic  
169 condition, respectively. Third, we anticipated a PMBR, reflecting the post-movement sensory  
170 "check", to be visible after movement suppression in the rhythmic STOP<sup>14</sup> and the discrete con-  
171 ditions, with differences between the discrete completed, successfully cancelled, and unsucces-  
172 fully cancelled actions, for the movement outcome differs in each case<sup>11</sup>.

## 173 **Method**

### 174 ***Participants***

175           Fifteen healthy individuals (9 males, mean age 25 years, SD = 2.2) served as voluntary  
176 participants. All were right-handed, as assessed by the Edinburgh Handedness Inventory <sup>63</sup>, and  
177 had a normal or corrected-to-normal vision. None of the participants reported a history of  
178 psychiatric or neurological disorders. The study was conducted with the informed consent of all  
179 participants according to the principles stated in the Declaration of Helsinki, and the procedures  
180 were approved by the local research ethics committee (Comité de Protection des Personnes Sud-  
181 Ouest et Outre-Mer II; ID-RCB: 2020-A03215-34).

### 182 ***Procedures***

#### 183 *Experimental procedures*

184           Participants performed two experiments that have been previously described <sup>43</sup>, and for  
185 which details are provided in Appendix A. Briefly, both experiments required participants to per-  
186 form voluntary right-hand movements on a graphic tablet using a stylus. In both experiments, the  
187 participants completed one practice block and 30 experimental blocks, each consisting of 20 trials.  
188 In the first experiment, visual GO stimuli called for the quick initiation of discrete-swipe move-  
189 ments (GO<sub>D</sub> condition). Following the primary GO stimulus, a STOP signal was presented infre-  
190 quently (in 25 % of trials, STOP<sub>D</sub> condition), indicating the participants to cancel the prepared  
191 movement, leading to successful-STOP<sub>D</sub> or fail-STOP<sub>D</sub> trials. The experiment was designed follow-  
192 ing the recent guideline for stop-signal tasks <sup>64</sup>. In the second experiment, participants executed  
193 self-paced rhythmic movements; a visual CONTINUE stimulus called for the continuation of a  
194 rhythmic movement (CONTINUE condition). As in the first (discrete) experiment, infrequently (in  
195 25 % of trials, STOP<sub>R</sub> condition), a STOP signal followed the primary CONTINUE stimulus to order  
196 participants to stop the ongoing movement quickly. Following such STOP trials, a rhythmic GO<sub>R</sub>  
197 trial was added to reengage participants in the rhythmic movement. In these GO<sub>R</sub> trials, partici-  
198 pants were instructed to transit from a static position to an oscillating movement as soon as the  
199 GO stimulus (green or blue) was presented. In both the discrete and rhythmic experiment, the  
200 minimal delay between two trials was 3500ms and the primary stimulus occurrence varied ran-  
201 domly in a 500 ms window. As such, the two experiments are close in design in terms of the stimuli



202 properties and the effectors engaged in the movement production; their main difference con-  
203 sisted in the movement type to perform and stop, namely prepared-discrete versus ongoing-  
204 rhythmic movements.

### 205 *EEG recording and preprocessing*

206 Scalp EEG was recorded using an ActiveTwo system (BioSemi Instrumentation, 64  
207 electrodes) with a sampling rate of 2048 Hz. The EEG electrodes were cautiously positioned based  
208 on four anatomical landmarks (i.e., nasion, inion, and preauricular points) in accordance with the  
209 5 % 10/20 international system<sup>65</sup>. Additional electrodes were placed below and above each eye.  
210 The data were online referenced to the BioSemi CMS-DRL reference. All offsets from the reference  
211 were kept below 15 mV. The EEG data were filtered online with a frequency bandpass filter of  
212 0.5-150 Hz. The participant's arm was fixed on the table to restrain the movement to wrist  
213 articulation and avoid muscular noise in the EEG signal due to substantial contraction of the biceps  
214 and deltoid muscles. Continuous EEG data were imported and preprocessed in bespoke scripts  
215 using functions from the EEGLAB Matlab plugin<sup>66</sup> :

- 216 • Visual inspection was used to remove channels with prominent artifacts in the  
217 continuous EEG.
- 218 • The EEG data were then re-referenced to a common average.
- 219 • The data were partitioned into epochs of 3 s (locked to the primary stimulus onset;  
220 –1000 ms to 2000 ms).
- 221 • Those epochs containing values exceeding the average across the data segments by 5  
222 SD were rejected.
- 223 • Scalp EEG data typically represent a mixture of activities originating from brain sources  
224 that are not separable based on channel data solely. Independent component analysis  
225 (ICA)<sup>67</sup> can be applied to identify statistically independent signal components (ICs)  
226 spatially filtered from the 64 channels data. An ICA was applied to continuous EEG data  
227 (concatenation of the EEG epochs) to identify 63 neural ICs contributing to the observed  
228 scalp data. Using the ICLABEL classifier<sup>68</sup> over the 30 first ICs, components with less than  
229 10% chance to account for neural activity were considered as artifacts, and removed  
230 from the EEG data structure, thus removing their contributions to the observed EEG.  
231 The rejection was systematically verified by visual inspection of component properties  
232 (time series, spectra, topography) according to ICLABEL guidelines<sup>68</sup>.

233           Across all participants, these procedures led to the omission of 8.6 % of the STOP trials in  
234 the discrete task (SD = 1.4 %) and 4.1 % of the rhythmic STOP trials (SD = 1.9 %).

## 235 **Measures**

### 236 *Reaction times (RT)*

237           The behavioral results of these experiments have been published separately<sup>43</sup>. Here and  
238 in the results section (below) we shortly present the behavioral measures that are essential to  
239 appreciate the main (EEG) results.

240           In the discrete experiment,  $RT_{GO}$  was calculated in the  $GO_D$  trials as the time between the  
241 primary stimulus onset and the response onset; the latter was defined as the moment the reach  
242 had exceeded 5 % of the Euclidean distance between the initial and furthest (i.e., end) position of  
243 the discrete-movement response. As an inhibitory RT, each participant's  $RT_{STOP-D}$  was estimated  
244 using the integrative method for stop-signal tasks<sup>64,69</sup>. In the rhythmic experiment, the move-  
245 ment-related StopTime was calculated as the time elapsed between the STOP signal onset and  
246 the end of the movement (i.e., null velocity). Each participant's  $RT_{STOP-R}$ , that is, the time between  
247 the STOP signal onset and the onset of movement alteration, was computed by identifying, within  
248 the StopTime, the first time point that the movement statistically deviated from the set of unin-  
249 terrupted movements in the phase space<sup>4</sup>.

### 250 *Lateralized readiness potentials*

251           In each condition LRPs were computed (using customized scripts written on Matlab) to  
252 assess the build-up of cortical motor activity following the primary stimulus (GO or CONTINUE).  
253 To this end, the EEG time series locked to the primary stimulus onset were averaged following the  
254 subtraction of a -200 to 0 ms pre-stimulus period as a baseline. The LRP was then derived from  
255 the difference between electrodes C3 (the electrode over the contralateral motor cortex) and C4  
256 (its ipsilateral counterpart). This was done for  $GO_D$ , successful- $STOP_D$ , and fail- $STOP_D$  trials in the  
257 discrete task and CONTINUE and  $STOP_R$  trials in the rhythmic one. As LRP is classically character-  
258 ized by a negative deflection underlying motor preparation, LRP peak amplitude was defined in  
259 each condition by looking for the minimum peak value following stimulus onset (LRPs were 15 Hz  
260 low-pass filtered for the peak detection). A similar subtraction, that is, contralateral activity minus  
261 ipsilateral activity and vice versa, was performed for each pair of scalp electrodes (e.g., F3 minus

262 F4, CP3 minus CP4 ...) in order to display the lateralized part of the EEG activity as a topography  
263 (Fig. 1).

#### 264 *Mu and Beta time-frequency analysis*

265 First, a time-frequency decomposition was performed according to the procedure  
266 described below, using the preprocessed EEG data from the C3 channel<sup>44,70,71</sup>. The resulting time-  
267 frequency maps are shown for each experimental condition in Appendix B to provide a classical  
268 view of our data.

269 Second, a time-frequency analysis was performed with a focus on the Mu and Beta  
270 frequency bands. Thereto, the preprocessed EEG data were band-pass filtered in the 8 to 30 Hz  
271 frequency range. We then computed an ICA to this filtered data. This procedure of applying an  
272 ICA decomposition to a specific frequency-band is able to outperform the traditional wide-band  
273 ICA both in terms of signal-to-noise ratio of the separated sources and in terms of the number of  
274 the identified independent components<sup>72</sup>. On the basis of the ICs resulting from the ICA  
275 algorithm, equivalent current dipoles were fitted using a four-shell spherical head model and  
276 standard electrode positions (DIPFIT toolbox<sup>73,74</sup>). Then, to cluster ICs across participants, feature  
277 vectors were created combining differences in spectra (8–30 Hz), dipole location, and scalp  
278 topography. Clusters were next identified using a k-means clustering algorithm ( $k = 12$ ) in EEGLAB.  
279 Among the resulting clusters, a single sensorimotor cluster was visually identified in each  
280 experiment (i.e., discrete and rhythmic) based on a centroparietal lateralized topography and a  
281 time-frequency map showing a clear ERD/ERS pattern.

282 In order to analyze the ERD/ERS activity of the MU and Beta bands, each IC of the two  
283 obtained clusters (i.e., discrete and rhythmic) was subjected to a time-frequency decomposition  
284 (using customized scripts written on Matlab) as follows: The EEG signals locked to the primary  
285 stimulus were convolved with complex 3-to-8 cycle-long Morlet's wavelets. Their central  
286 frequencies were changed from 8 to 30 Hz in 0.5 Hz steps (and from 0.5 to 50 Hz for the C3 channel  
287 analysis in Appendix B). From the wavelet transformed signal,  $w_k(t, f)$ , of trial  $k$  at time  $t$  (3.5 ms  
288 time resolution) and with frequency  $f$ , the instantaneous power spectrum  $p_k(t, f) =$   
289  $R(w_k(t, f))^2 + I(w_k(t, f))^2$  was extracted ( $R$  and  $I$  symbolize the real and imaginary parts of a  
290 complex number, respectively). The mean power spectrum (i.e., averaged across trials) was then  
291 computed for each participant in the GO<sub>D</sub>, CONTINUE, STOP<sub>D</sub>, STOP<sub>R</sub> and GO<sub>R</sub> conditions as follow:

292 
$$Power = \frac{1}{N} \cdot \sum_{k=1}^N p_k(t, f), (N = \text{number of trials}).$$

293 The power spectrum was then normalized with respect to a -400 to -100 ms pre-stimulus baseline  
294 and transformed to decibel scale ( $10 \cdot \log_{10}$  of the signal). In the rhythmic experiment, the base-  
295 line was extracted from the averaged  $GO_R$  trials (as in CONTINUE and  $STOP_R$  conditions, the pre-  
296 stimulus period includes movement). This mean power (time  $\times$  frequency  $\times$  power) was next av-  
297 eraged along the frequency dimension in an 8 Hz - 13 Hz window to compute the Mu power and  
298 a 15 Hz - 30 Hz window for the Beta power time series (time  $\times$  power).

299 To detect significant ERD and ERS, the resulting Mu and Beta power time series of each  
300 condition was compared against the mean value of the power in the baseline time range (-400 to  
301 -100 ms). These comparisons were performed based on a non-parametric permutation procedure  
302 (see below). Thus, each time-period for which the power values were significantly below the base-  
303 line level was indexed as an ERD. Each time-period subsequent to an ERD and for which power  
304 did not significantly differ from the baseline level was indexed as an ERS. Each time-period includ-  
305 ing power values that were significantly above the baseline level was indexed as a power-re-  
306 bound. To compare Mu and Beta dynamics between conditions, power time series were pairwise  
307 compared using the same non-parametric permutation procedure (see below).

### 308 *Brain sources reconstruction*

309 To estimate the brain structures pertaining to the clustered ICs, a brain-source reconstruc-  
310 tion procedure was applied. For each clustered IC, the inverse ICA weight projections onto the  
311 original EEG channels were exported to the sLORETA (standardized low-resolution brain electro-  
312 magnetic tomography) data processing module<sup>75</sup>. sLORETA provides a unique solution to the in-  
313 verse problem<sup>75-77</sup>. For sLORETA, the intracerebral volume is partitioned into 6239 voxels with a  
314 5 mm spatial resolution. Then, the standardized current density at each voxel is calculated in a  
315 realistic head model<sup>78</sup> based on the MNI152 template.

### 316 *Statistical analysis*

317 To compare LRP time series between conditions at the group level, the LRPs were sub-  
318 jected to a nonparametric permutation procedure<sup>79</sup>. Specifically, the 15 participants' LRPs were  
319 pooled over the two compared conditions (15 per condition). Two sets of 15 LRPs were then

320 drawn randomly (unpaired) from this pool, and the differential grand-average LRP was computed  
321 between the two sets. This procedure was repeated 10 000 times, thus producing a LRP distribu-  
322 tion based on shuffled data under the null hypothesis. For each time point, a  $p$  value was com-  
323 puted as the proportion of these pseudo-differential LRPs that exceeded the observed partici-  
324 pants' average differential LRP. This  $p$  value indicates whether the observed power distribution  
325 for the two conditions diverged more than expected for random data ( $p = .05$  threshold). To cor-  
326 rect for multiple comparisons, we analyzed the resulting distributions of  $p$  values to compute  $p$   
327 thresholds corresponding to the 2.5th percentile of the smallest, and the 97.5th percentile of the  
328 largest  $p$  values distribution<sup>80</sup>. The same procedure was applied to the averaged Mu and Beta  
329 power time series to, first, assess ERD and ERS significance by comparing power time series  
330 against baseline values and, second, to assess power difference significance between conditions.  
331 In the case of the Mu and Beta power time series, the between-experiment comparison included  
332 an unequal number of ICs (20 discrete vs. 19 rhythmic ICs, respectively, see Results section). This  
333 variation was accounted for in the random-permutation stage of the statistical procedure by ran-  
334 domly selecting a pool of 19 ICs from each experimentation at each iteration.

335           Additionally, the study included measures of self-reported impulsivity, which were corre-  
336 lated with the EEG measures. This exploratory analysis was delegated to Appendix C for reasons  
337 of focus.

## 338 Results

### 339 Behavior

340 In the discrete experiment, the  $RT_{GO}$  ( $M = 472$  ms,  $SD = 64$  ms) and response probability  
341 ( $M = .54$ ,  $SD = .08$ ) permitted the estimation of individual's  $RT_{STOP-D}$  ( $M = 269$  ms,  $SD = 45$  ms). The  
342 average STOP-signal delay (SSD) for participants was 203 ms ( $SD = 79$  ms). In the rhythmic exper-  
343 iment, the spontaneous oscillation frequency was 1.65 Hz on average ( $SD = 0.54$  Hz) and the anal-  
344 ysis of the obtained StopTimes ( $M = 399$ ,  $SD = 34$  ms) enabled the computation of individual's  
345  $RT_{STOP-R}$  ( $M = 268$ ,  $SD = 24$  ms). Importantly, the  $RT_{STOP-D}$  and the  $RT_{STOP-R}$  values did not differ ( $t =$   
346  $.03$ ,  $p > .05$ ) and were unrelated across participants ( $r = .02$ ,  $p > .05$ ), suggesting independent but  
347 comparable timing of inhibition processing between the two experiments.

### 348 Lateralized readiness potentials

349 In every condition, the LRP computation resulted in a typical negative deflection as por-  
350 trayed in Fig. 1. In the discrete experiment, the permutation analysis identified a significant dif-  
351 ference in the 381 - 556 ms time window ( $p < .05$ , corrected) between  $GO_D$  and successful- $STOP_D$   
352 conditions (Fig. 1.A) and in the 419 - 493 ms window between  $GO_D$  and fail- $STOP_D$  conditions. In  
353 the rhythmic experiment, the same procedure identified a significant difference in the 377 - 434  
354 ms time window ( $p < .05$ , corrected) between CONTINUE and  $STOP_R$  conditions (Fig. 1.B). To com-  
355 pare the "inhibitory effect" between the LRPs from the two experiments, differential LRPs were  
356 computed based on the  $GO_D$  minus successful- $STOP_D$  difference for the discrete one and the CON-  
357 TINUE minus  $STOP_R$  difference for the rhythmic one. The two differential LRPs were next com-  
358 pared through the same nonparametric permutation procedure, which revealed that the LRP re-  
359 duction was significantly larger in the discrete experiment than in the rhythmic one in the 402 -  
360 1,243 ms time window ( $p < .05$ , corrected; Fig. 1.C). Still, the peak amplitude of the differential  
361 LRP was significantly correlated between discrete and rhythmic experiments (*Pearson*  $r = .96$ ,  $p <$   
362  $.001$ ). Additionally, the exploratory analysis of individual's motor impulsivity indicated a signifi-  
363 cantly lower LRP peak amplitude for the more impulsive participants in the  $GO_D$  and fail- $STOP_D$   
364 conditions (details in Appendix C.).

365

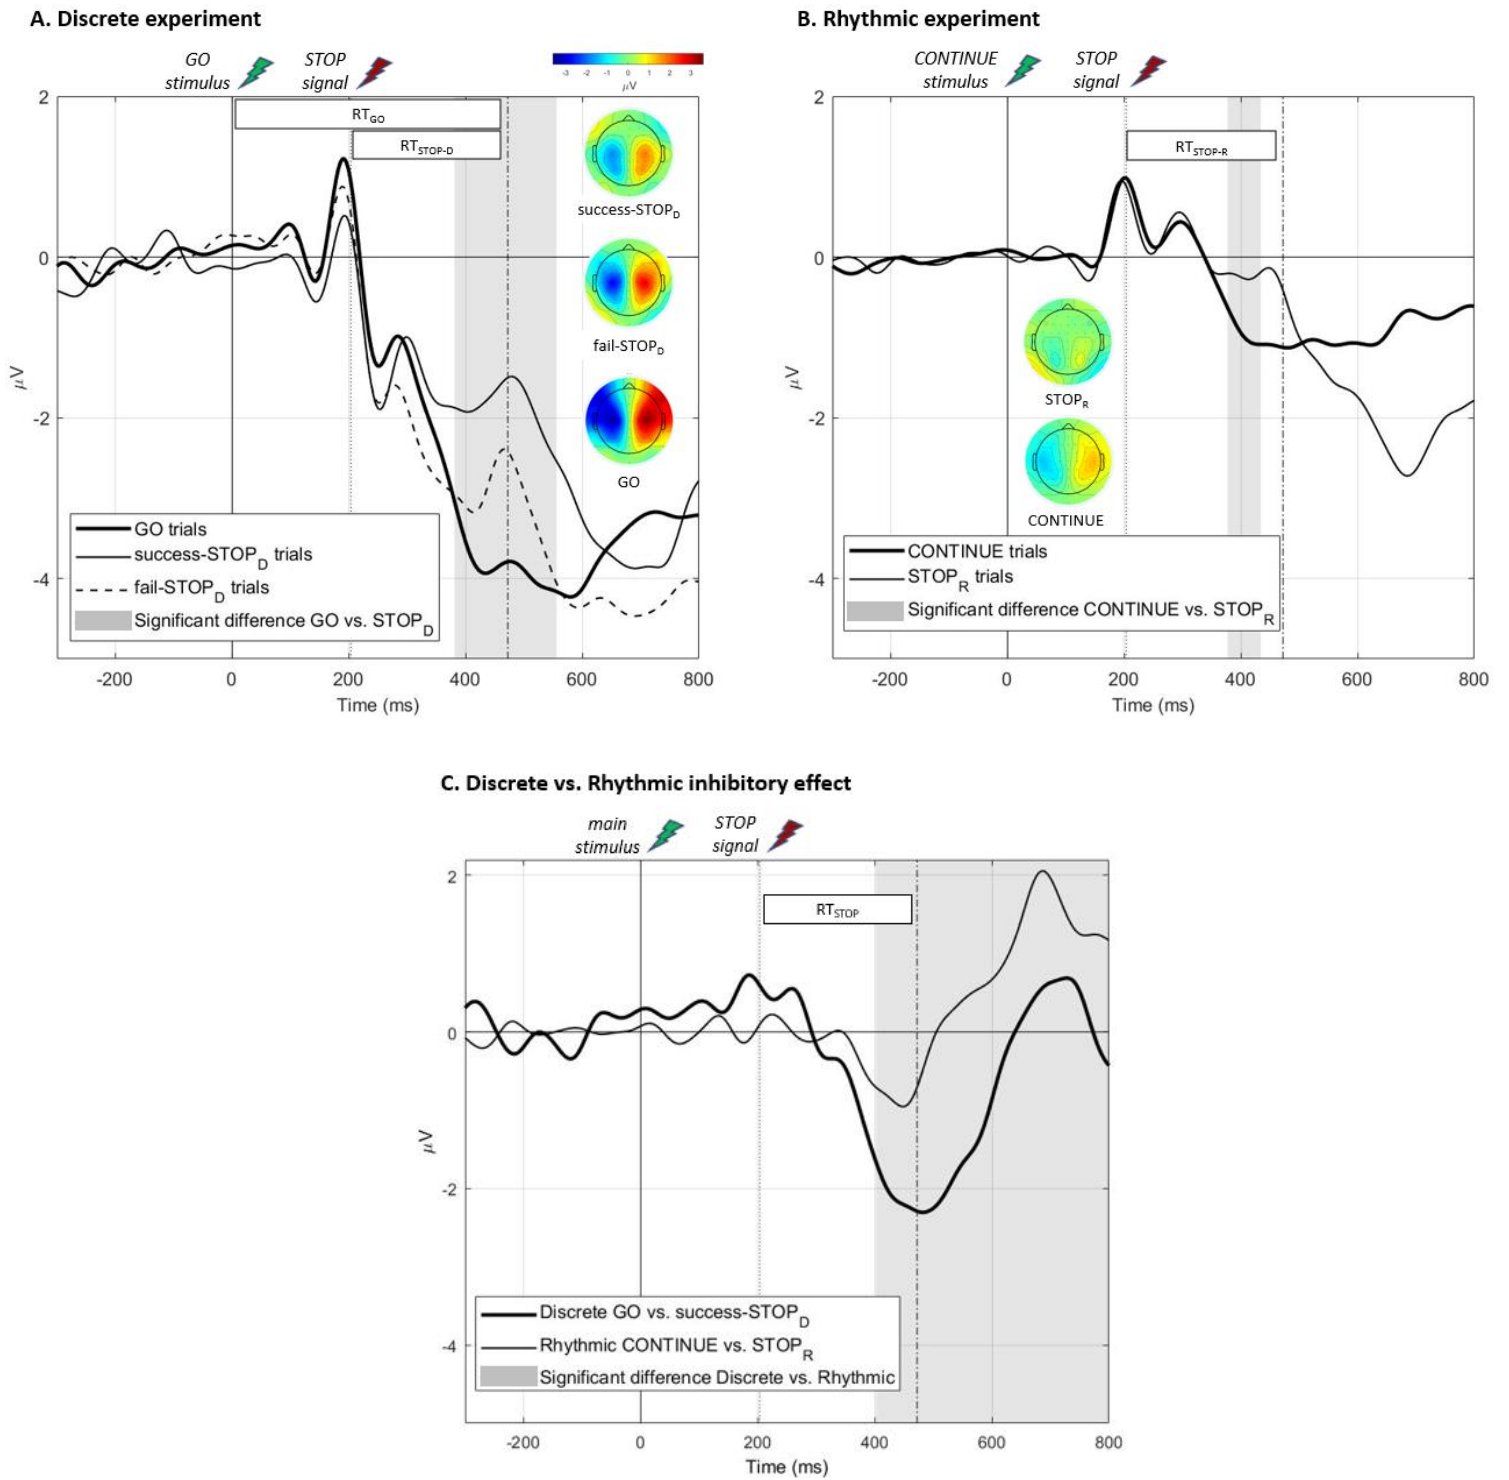

**Fig.1: LRP analysis**

**Panel A:** LRP (grand–average) computed in the discrete  $GO_D$ , success- $STOP_D$ , and fail- $STOP_D$  conditions.  $GO_D$  LRP differed significantly from success- $STOP_D$  and fail- $STOP_D$  conditions. In grey, the region of significant difference (according to the nonparametric permutation analysis) between  $GO_D$  and success- $STOP_D$  conditions ( $p < .05$ , corrected).

**Panel B:** LRP (grand–average) computed in the rhythmic CONTINUE and  $STOP_R$  conditions. In grey, the region of significant difference between the two conditions ( $p < .05$ , corrected).

Topographies are presented in panels A and B as the lateralized topographies computed at each condition LRP peak latency (see Method section).

**Panel C:** LRP inhibitory effect computed in the discrete ( $GO_D$  minus success- $STOP_D$  LRP) and the rhythmic (CONTINUE minus  $STOP_R$  LRP) experiments. In grey, the region of significant difference between these two differential LRPs ( $p < .05$ , corrected).

The represented SSD,  $RT_{GO}$  and  $RT_{STOP}$  latencies are based on the average of the obtained latencies over all the participants. LRPs were 15 Hz low-pass filtered for graphical purpose.



### 367 ***Mu and Beta oscillations***

368           The power maps resulting from the time-frequency decomposition applied to the prepro-  
369 cessed EEG data of the C3 channel (0.5 to 50 Hz) are shown for the different conditions in Appen-  
370 dix B.

371           In both experiments, only one sensorimotor cluster could be identified. Thus, a single sen-  
372 sorimotor cluster of 20 ICs (contribution of 15 participants) was retained for the discrete experi-  
373 ment. Another single cluster of 19 ICs was retained (15 participants) for the rhythmic experiment  
374 (Fig. 2.A). The power maps resulting from the time-frequency decomposition applied to the clus-  
375 tered components (8 to 30 Hz) are shown in Fig. 2.B. The detailed time course of Mu (8 - 13 Hz)  
376 and Beta (15 - 30 Hz) bands power and significant ERD/ERS are highlighted in Fig. 3. Overall, Mu  
377 and Beta power show the expected dynamics, that is, an ERD during the movement execution.  
378 This ERD appeared transient in the context of a discrete movement execution and sustained when  
379 the movement was rhythmic. The Mu/Beta ERD were followed by an ERS (Fig. 3). Notably, the ERS  
380 significantly exceeded the baseline level in the STOP<sub>R</sub> condition only, evidencing of a post-move-  
381 ment Mu and Beta rebound in this condition.

382           The Mu and Beta time-series were then compared between the experimental conditions  
383 in a pairwise fashion (non-parametric permutation procedure, see Method). The detailed result  
384 of these comparisons is provided in Table 1. Importantly, Mu power did not vary significantly be-  
385 tween the three conditions of the discrete experiment: there was no significant difference the  
386 between movement-executed conditions (GO<sub>D</sub> and fail-STOP<sub>D</sub>) and the no-actual-movement con-  
387 dition (success-STOP<sub>D</sub>). In the rhythmic experiment, the significantly higher Mu power in the  
388 STOP<sub>R</sub> condition characterized a post-movement Mu ERS that was not present in the GO<sub>R</sub> and  
389 CONTINUE conditions. When comparing the two experiments, the Mu power increase was  
390 stronger after the forced rhythmic-movement stop in the STOP<sub>R</sub> condition as compared to all the  
391 other conditions, including the GO<sub>D</sub> and success-STOP<sub>D</sub> conditions, which are associated with a  
392 discrete-movement normal completion and cancellation, respectively.

393           Regarding the Beta power, the discrete conditions GO<sub>D</sub> and fail-STOP<sub>D</sub> in which the move-  
394 ment was executed did not significantly differ. In contrast, the success-STOP<sub>D</sub> condition exposed  
395 a higher Beta power than GO<sub>D</sub>, from 1,161 to 1,287 ms, and than fail-STOP<sub>D</sub>, from 559 to 1,328  
396 ms. In the rhythmic experiment, the significantly higher Beta power in the STOP<sub>R</sub> condition related

397 to a post-movement Beta ERS that was not present in the GO<sub>R</sub> and CONTINUE conditions (Fig. 3.).  
398 When comparing the two experiments, the pattern of differences was similar to the Mu power,  
399 with the post-movement Beta power increase being stronger in the STOP<sub>R</sub> than the GO<sub>D</sub> or the  
400 success-STOP<sub>D</sub>. Additionally, the exploratory analysis of individual's motor impulsivity indicated  
401 significantly a higher PMBR amplitude for the more impulsive participants in the STOP<sub>R</sub> conditions  
402 (details in Appendix C.).

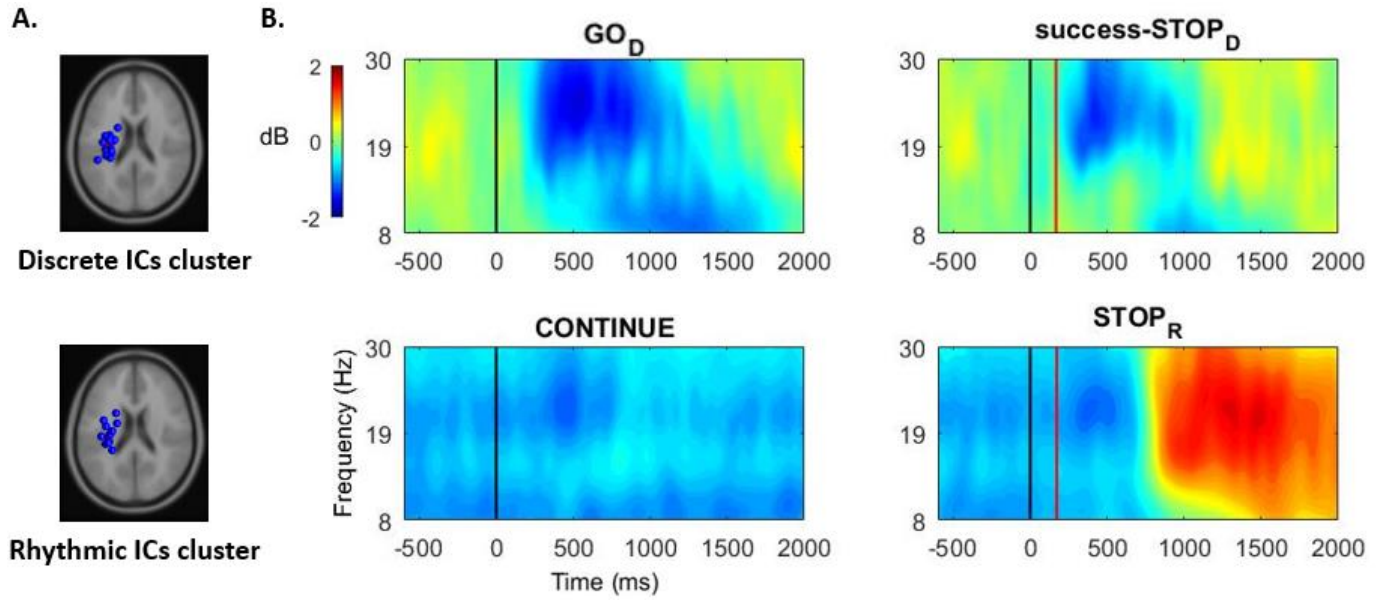

**Fig.2: Component dimension time-frequency power analysis**

**Panel A:** Equivalent current dipoles of the clustered sensorimotor components in the discrete (15 participants, 20 ICs) and the rhythmic (15 participants, 19 ICs) experiments.

**Panel B:** Time-frequency power maps (ICs grand-average) computed in the discrete ( $GO_D$  and success- $STOP_D$ ) and rhythmic (CONTINUE and  $STOP_R$ ) conditions. Black line: Primary (GO or CONTINUE) stimulus onset. Red line: STOP signal onset (the represented onset is based on the average of the obtained SSD, over all the participants). The blue scale represents desynchronization and the red scale (re)synchronization of the brain activity.

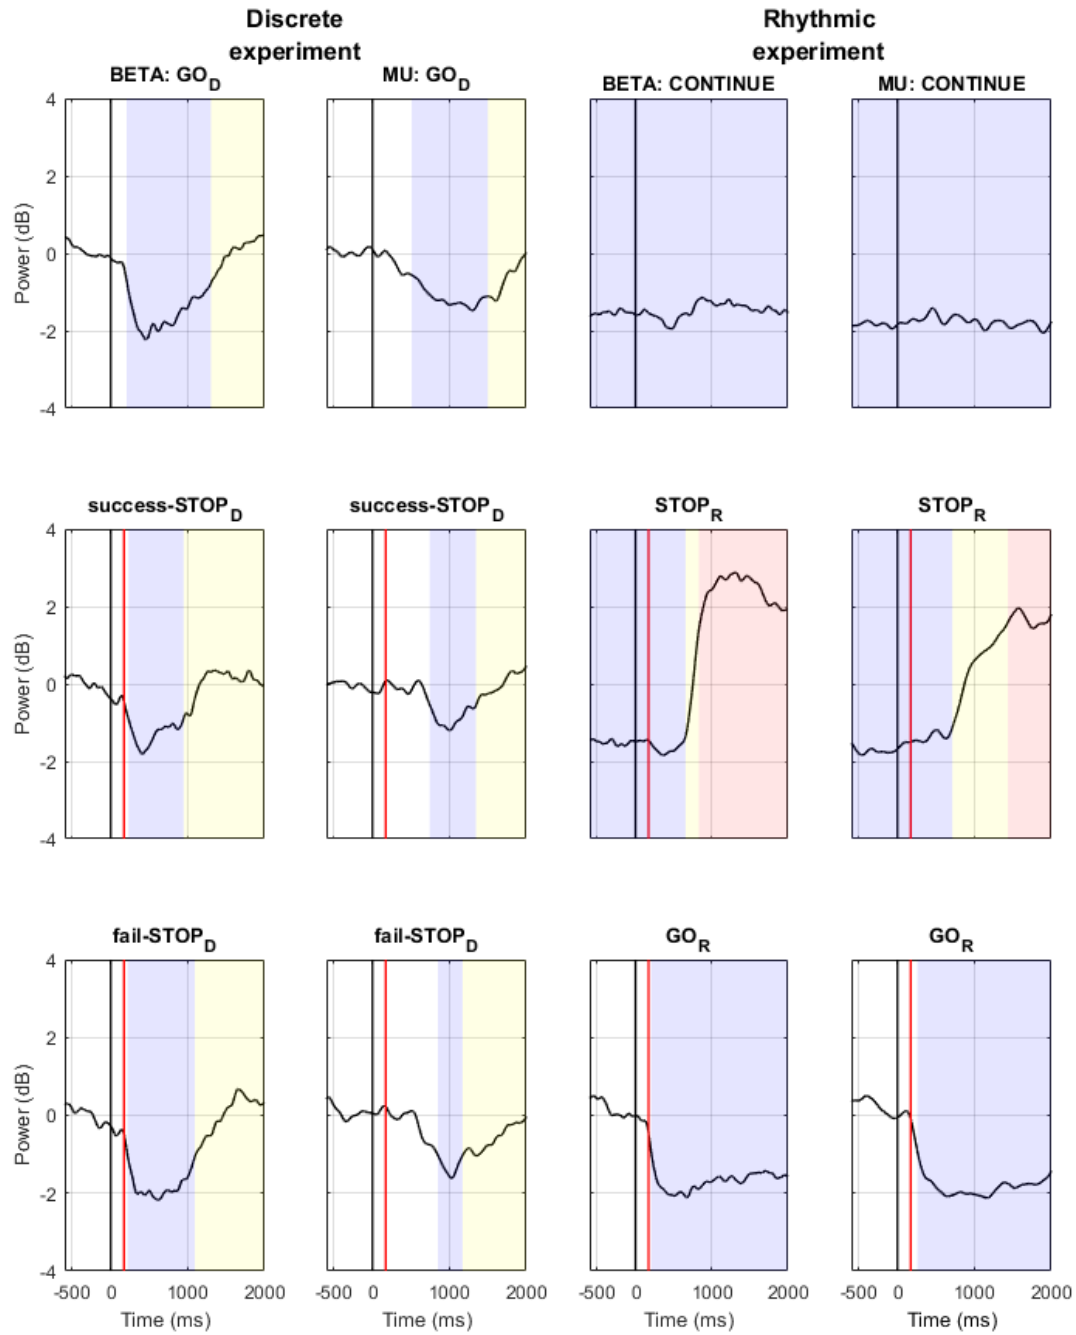

404

405

**Fig.3: Beta and Mu power time series**

*Power time series (ICs grand-average) averaged in the Beta (15 to 30 Hz) and the Mu (8 to 13 Hz) frequency ranges from the time-frequency power maps computed in the discrete ( $GO_D$ , success- $STOP_D$  and fail- $STOP_D$ ) and rhythmic ( $CONTINUE$ ,  $STOP_R$  and  $GO_R$ ) conditions. Black line: Primary ( $GO$  or  $CONTINUE$ ) stimulus onset. Red line:  $STOP$  signal onset (the represented onset is based on the average of the obtained SSD, over all the participants).*

*Resulting from the non-parametric permutation comparison against baseline value, blue, yellow and red colors indicate time-ranges of significant ERD, ERS and power-rebound, respectively (see Method).*

| <b>BETA power</b>         |                                                                                                                            |                                                                                                                                      |                                                                                                                                   |                                                                                                        |                                                                                                                                      |                                                                                                                             |
|---------------------------|----------------------------------------------------------------------------------------------------------------------------|--------------------------------------------------------------------------------------------------------------------------------------|-----------------------------------------------------------------------------------------------------------------------------------|--------------------------------------------------------------------------------------------------------|--------------------------------------------------------------------------------------------------------------------------------------|-----------------------------------------------------------------------------------------------------------------------------|
| <b>MU power</b>           | GO <sub>D</sub>                                                                                                            | success-STOP <sub>D</sub>                                                                                                            | fail-STOP <sub>D</sub>                                                                                                            | CONTINUE                                                                                               | STOP <sub>R</sub>                                                                                                                    | GO <sub>R</sub>                                                                                                             |
| GO <sub>D</sub>           | –                                                                                                                          | Higher success-STOP <sub>D</sub> power from 1,161 to 1,287 ms<br>$z > 1.1473$                                                        | <b>N.S.</b><br>$z < 1.1911$                                                                                                       | Higher GO <sub>D</sub> power from -1,500 to 154 ms and from 1,468 to 2,000 ms<br>$z > 1.2438$          | Higher GO <sub>D</sub> power from -1,500 to 172 ms and higher STOP <sub>R</sub> power from 748 to 1,860 ms<br>$z > 1.7282$           | Higher GO <sub>D</sub> power from 1,374 to 2,000 ms<br>$z > 1.2392$                                                         |
| success-STOP <sub>D</sub> | <b>N.S.</b><br>$z < 1.5210$                                                                                                | –                                                                                                                                    | Higher success-STOP <sub>D</sub> power from 559 to 1,328 ms<br>$z > 1.1018$                                                       | Higher success-STOP <sub>D</sub> power from -1,500 to 10 ms and from 1,133 to 2,000 ms<br>$z > 1.1908$ | Higher success-STOP <sub>D</sub> power from -1,500 to 154 ms and higher STOP <sub>R</sub> power from 780 to 2,000 ms<br>$z > 1.5789$ | Higher success-STOP <sub>D</sub> power from 1,091 to 2,000 ms<br>$z > 1.1954$                                               |
| fail-STOP <sub>D</sub>    | <b>N.S.</b><br>$z < 1.4692$                                                                                                | <b>N.S.</b><br>$z < 1.4689$                                                                                                          | –                                                                                                                                 | Higher fail-STOP <sub>D</sub> power from -1,500 to 179 ms and from 1,447 to 2,000 ms<br>$z > 1.2893$   | Higher fail-STOP <sub>D</sub> power from -1,500 to 167 ms and higher STOP <sub>R</sub> power from 741 to 1,654 ms<br>$z > 1.7432$    | Higher fail-STOP <sub>D</sub> power from 1,325 to 2,000 ms<br>$z > 1.2455$                                                  |
| CONTINUE                  | Higher GO <sub>D</sub> power from -1,500 to 397 ms and from 1,871 to 2,000 ms<br>$z > 1.6163$                              | Higher success-STOP <sub>D</sub> power from -1,500 to 664 ms and from 1,458 to 2,000 ms<br>$z > 1.6883$                              | Higher fail-STOP <sub>D</sub> power from -1,500 to 399 ms and from 1,804 to 2,000 ms<br>$z > 1.5852$                              | –                                                                                                      | Higher STOP <sub>R</sub> power from 773 to 2,000 ms<br>$z > 1.7528$                                                                  | Higher GO <sub>R</sub> power from -1,500 to 164 ms<br>$z > 1.1942$                                                          |
| STOP <sub>R</sub>         | Higher GO <sub>D</sub> power from -1,500 to 331 ms and higher STOP <sub>R</sub> power from 958 to 2,000 ms<br>$z > 1.7832$ | Higher success-STOP <sub>D</sub> power from -1,500 to 189 ms and higher STOP <sub>R</sub> power from 979 to 2,000 ms<br>$z > 1.7575$ | Higher fail-STOP <sub>D</sub> power from -1,500 to 175 ms and higher STOP <sub>R</sub> power from 928 to 2,000 ms<br>$z > 1.7198$ | Higher STOP <sub>R</sub> power from 888 to 2,000 ms<br>$z > 1.9067$                                    | –                                                                                                                                    | Higher GO <sub>R</sub> power from -1,500 to -395 ms and higher STOP <sub>R</sub> power from 755 to 2,000 ms<br>$z > 1.8822$ |
| GO <sub>R</sub>           | <b>N.S.</b><br>$z < 1.5813$                                                                                                | Higher success-STOP <sub>D</sub> power from 493 to 2,000 ms<br>$z > 1.6655$                                                          | Higher fail-STOP <sub>D</sub> power from 1,152 to 2,000 ms<br>$z > 1.5310$                                                        | Higher GO <sub>R</sub> power from -1,500 to 178 ms<br>$z > 1.6104$                                     | Higher GO <sub>R</sub> power from -1,500 to -216 ms and higher STOP <sub>R</sub> power from 865 to 2,000 ms<br>$z > 1.9595$          | –                                                                                                                           |

407

**Table 1: Pairwise condition comparison of Mu and Beta power time series**

*Mu and Beta power time series from the clustered ICs were compared between experimental conditions in a pairwise fashion using a non-parametric permutation procedure (see Method section). The resulting time-ranges of significant difference between conditions are reported.*

*Z values indicate the threshold values corresponding to  $p < .05$  (corrected for multiple comparisons, see Method) retained to assess significance.*

*N.S. Non-significant.*

408 ***Brain sources reconstruction***

409           Based on the voxel-based sLORETA images, we searched for brain activation using voxel-  
410 wise randomization  $t$ -tests with 5000 permutations, based on nonparametric statistical mapping.  
411 This procedure was performed separately for the ICs of the discrete and rhythmic clusters. Signif-  
412 icant voxels ( $p < .01$ , corrected for multiple comparisons) were located in the MNI-brain (Fig. 4)  
413 regarding the engaged Brodmann areas (BA) and the voxels coordinates. In the discrete experi-  
414 ment, the clustered ICs activity was related to the activation of sensory regions such as the pri-  
415 mary somatosensory (BA 1, BA 2, BA 3) and the somatosensory association (BA 5) cortices, as well  
416 as M1 (BA 4). In the rhythmic experiment, activation was found in the primary somatosensory  
417 cortex (BA 3), as well as pre-motor areas (BA 6), and M1 (BA 4) (detailed MNI coordinates of the  
418 activation are provided in Table 2).



419

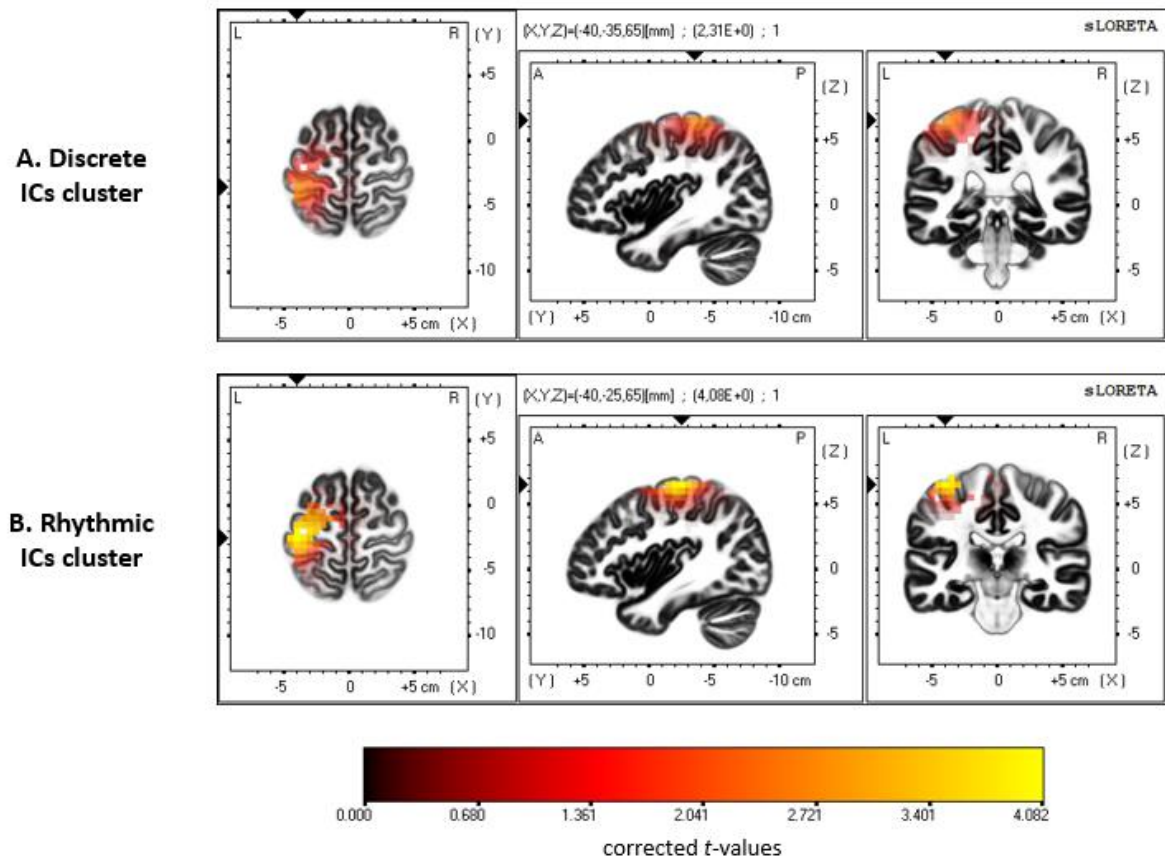

**Fig.4: Brain sources reconstruction**

The sLORETA images showing significant estimated activation pertaining to the discrete (**panel A**) and rhythmic (**panel B**) clustered ICs, for three orthogonal brain slices (horizontal, sagittal, coronal). Only the voxels that passed the  $p$  value threshold ( $p < .01$ , corrected) are shown in color. The color represents  $t$  value. In the discrete experiment, activation was found in sensory (BA 1, BA 2, BA 3, BA 5) and motor areas (BA 4). In the rhythmic experiment, fewer sensory (BA 3) but (one) more motor regions (BA 4, BA 6) were involved. Detailed MNI localization of the significant activation is provided in Tab. 2.

420

| Area                    | Region            | BA | X   | Y   | Z  | t-val |
|-------------------------|-------------------|----|-----|-----|----|-------|
| <b>Discrete cluster</b> |                   |    |     |     |    |       |
| Somatosensory           | Postcentral gyrus | 2  | -40 | -35 | 65 | 2.31  |
|                         | Postcentral gyrus | 1  | -35 | -35 | 70 | 2.25  |
|                         | Postcentral gyrus | 3  | -35 | -35 | 65 | 2.25  |
|                         | Postcentral gyrus | 5  | -40 | -45 | 65 | 2.16  |
| Motor                   | Precentral gyrus  | 4  | -35 | -30 | 70 | 2.14  |
| <b>Rhythmic cluster</b> |                   |    |     |     |    |       |
| Somatosensory           | Postcentral gyrus | 3  | -40 | -25 | 65 | 4.08  |
| Motor                   | Precentral gyrus  | 6  | -40 | -20 | 65 | 4.07  |
|                         | Precentral gyrus  | 4  | -35 | -25 | 65 | 3.93  |

**Tab. 2: Summary of significant activation from the brain sLORETA reconstruction**

*Significant ( $p < .01$ , corrected) regions are indicated with the name of Brodmann area (BA), MNI coordinates (X, Y, Z) and t value (t-val) of the higher statistical thresholded voxel.*

## 421 Discussion

422 The present study examined the neural sensorimotor activity related to performing and  
423 suppressing movements pertaining to the discrete and rhythmic classes. EEG data were analyzed  
424 in both contexts to provide new insight into the function of LRP and sensorimotor ERD/ERS pat-  
425 terns in the Mu and Beta frequency bands. Notably, the estimated generators of the cortical  
426 ERD/ERS pattern identified over peri-Rolandic areas closely overlap those reported in previous  
427 work<sup>14,50,52,62</sup>. Indeed, we identified both somatosensory and motor cortical areas as generators  
428 of the observed ERD/ERS pattern, supporting the idea that both movement-related and sensory-  
429 related neural activity may be engaged. The inhibition mechanism triggered by the STOP signal  
430 affected the LRP in both the discrete and rhythmic experiments, and occurred before the end of  
431 the  $RT_{GO}$ ,  $RT_{STOP-D}$ , or  $RT_{STOP-R}$  latencies. Additionally, the measured  $RT_{GO}$  for movement generation  
432 and  $RT_{STOP}$  for movement suppression fell in the time range classically observed in stop-signal ex-  
433 periments across various movement responses<sup>81-84</sup>. The similarity between the discrete and the  
434 rhythmic  $RT_{STOP}$  values indicates that the processes engaged in aborting the two movement clas-  
435 ses are of comparable duration.

436 Our first expectation dealt with the LRP dynamics. We hypothesized a large LRP following  
437 a GO stimulus to contrast with the absence of an LRP (i.e., zero amplitude) following a CONTINUE  
438 stimulus, and that this LRP amplitude would be reduced by the STOP signal occurrence only in the  
439 discrete experiment. For the discrete movements, an LRP was triggered by the primary GO stim-  
440 ulus, and was subsequently impacted by the STOP signal in both successful- $STOP_D$  and failed-  
441  $STOP_D$  trials. These findings are consistent with the notion that an inhibition signal that arrives at  
442 M1 attenuates cortical motor outflow, as reflected by the reduction of the LRP amplitude<sup>40</sup>; in  
443 the case of fail- $STOP_D$  trials, this reduction is insufficient to restraint the response threshold to be  
444 reached<sup>33</sup>. For the rhythmic movements, the CONTINUE stimuli occurring during the ongoing  
445 movement also led to an LRP response, albeit weaker than in the  $GO_D$  instruction. Rebutting our  
446 hypothesis, this LRP response indicates that the presentation of the CONTINUE stimulus during  
447 the ongoing movement triggers a non-negligible cortical motor activity. Thus, LRP might not index  
448 pre-movement processing only, but also any cortical motor activity occurring before and during  
449 movement. Alternatively, if the rhythmic movement is implemented as a concatenation of dis-  
450 crete units, the LRP might reflect the cortical motor activity engaged in the initiation of each unit.

451 Indeed, previous studies have shown that the sensorimotor activity recorded in rhythmic move-  
452 ments suggested a discrete-units-concatenation when the movement frequency was ranging  
453 from 0.33 to 1 Hz, whereas this activity was 'truly' continuous for above 1 Hz movement frequen-  
454 cies<sup>31,32</sup>. Nevertheless, as the rhythmic movements in the present study were, on average, per-  
455 formed at 1.65 Hz, the LRP observed in the CONTINUE trials are unlikely to reflect motor cortical  
456 activity related to the concatenation of discrete movements.

457         The LRP amplitude following the CONTINUE stimulus was reduced in the STOP<sub>R</sub> condition.  
458 Notably, the amplitude of this "inhibitory effect", albeit weaker, was strongly correlated to the  
459 GO minus STOP<sub>D</sub> LRP difference measured in the discrete experiment. Thus, the LRP reduction  
460 might index action inhibition in the context of both prepared-discrete and ongoing-rhythmic  
461 movement suppression. This interpretation is consistent with the notion that LRP is a marker of  
462 the cortical motor activity as a common final pathway in the central control of movement and  
463 thus be the "site" where (frontal) executive "agents" exert inhibitory control<sup>85</sup>. Note that the  
464 commonality of the motor site of inhibition in discrete and rhythmic action inhibition does not  
465 provide information about the inhibiting "agents" engaged in the two situations, as the two levels  
466 of inhibition processing can be independent<sup>40</sup>. Notably, the EEG markers of the executive agents  
467 engaged in action inhibition tended to dissociate the processing of discrete action cancelling and  
468 rhythmic action stopping<sup>43</sup>.

469         Our second expectation that the Mu ERD/ERS observed pattern should show a transient  
470 vs. sustained activity for the discrete and rhythmic experiments, respectively, was confirmed. This  
471 validates the discrete vs. rhythmic nature of the performed movements and aligns with the un-  
472 derstanding of the Mu rhythm as a correlate of the interaction between sensory and motor infor-  
473 mation processing: The sustained ERD during ongoing movement may correspond to a closed-  
474 loop control for the online control of the ongoing movement. In contrast, the transient Mu  
475 ERD/ERS pattern did not differ between the performed discrete actions in the GO<sub>D</sub> and fail-STOP<sub>D</sub>  
476 conditions and the cancelled ones in the success-STOP<sub>D</sub> condition. This finding is in line with the  
477 Mu rhythm being independent of the movement outcome, which may be the case if the Mu  
478 rhythm encodes the processing of sensorimotor integration in an open-loop control of discrete  
479 actions. Notably, the reactive inhibition of discrete actions has been coherently conceptualized as  
480 a dual-step process encompassing attention reorientation (by the STOP signal) and prepared-  
481 movement cancellation<sup>86-88</sup>. The reorientation of attention is not specific to action inhibition but

482 generalizes to multiple situations implicating goal redirection, including the reaction to a GO stim-  
483 ulus<sup>88</sup>. Following the hypothesis that the Mu rhythm is an alpha-like oscillation that links percep-  
484 tion and action<sup>49,50</sup>, a Mu ERD is expected to occur when cortical motor activity is modulated  
485 following attentional reorientation, which includes both discrete GO<sub>D</sub> and STOP<sub>D</sub> trials. Hence, the  
486 absence of actual movement in successful-STOP<sub>D</sub> trials should not modulate the Mu rhythm dy-  
487 namics relative to Mu rhythm in GO<sub>D</sub> trials. Our results are in accordance with this expectation. A  
488 compatible finding is that the Mu ERD/ERS varies with attention<sup>89</sup>.

489         Confirming our third expectation, the Beta ERD appeared sustained for the ongoing rhyth-  
490 mic movement whereas it was transient for the discrete movement, thus following the motor  
491 activation dynamics. Next, a Beta ERS occurred following the action. This is consistent with the  
492 purported role of the Beta ERS in evaluating the action sensory output, in that it was lower for  
493 discrete-movement failed cancellation compared to successful cancellation. Previous findings al-  
494 ready reported this "error-related Beta rebound reduction", which may relate to salient er-  
495 ror/mismatch detection mechanisms<sup>90,91</sup>. Still, some results diverged from our expectations. On  
496 the one hand, the PMBR was higher following a forced rhythmic movement stop (STOP<sub>R</sub>) than the  
497 Beta ERS following discrete movement completion (GO<sub>D</sub>). On the other hand, the discrete-action  
498 Beta ERS was higher after a successful action cancellation than following action completion in GO<sub>D</sub>  
499 and fail-STOP<sub>D</sub> conditions, which did not differ in this regard. These two findings support the no-  
500 tion that a higher Beta ERS is a correlate of active action suppression<sup>14</sup>, here triggered by a STOP  
501 signal. Whereas Parkes et al. identified PMBR neural generators in post-Rolandic (sensory) areas,  
502 which they interpreted in favor of the notion that PMBR reflects sensory reafference evaluation  
503<sup>59</sup>, other studies suggested that the PMBR was also related to pre-Rolandic (motor) activation  
504<sup>58,92,93</sup>. Our results are in line with the latter findings, with both a significant PMBR and pre-motor  
505 activation being reported for the rhythmic but not discrete actions. This engagement of pre-motor  
506 cortices in the rhythmic movements is congruent with the previously reported pre-supplementary  
507 motor area activation in PMBR<sup>94,95</sup>. Thus, our results do not exclude that Beta ERS is an index of  
508 action sensory outcome evaluation, but they also support the view that it is associated with an  
509 active inhibition process of cortical motor activity.

510         Nonetheless, this active inhibition hypothesis of the PMBR functional role is silent on why  
511 the ongoing action-forced stop gave rise to a large PMBR over contralateral sensorimotor cortical

512 areas, whereas a much weaker Beta ERS followed discrete action cancellation. A tentative expla-  
513 nation is that the inhibitory process engaged in movement cancellation acts at the movement  
514 preparation level, as indicated by the LRP decrease and the ERD abortion in the STOP<sub>D</sub> condition  
515 <sup>41</sup>. Thus, inhibition might lie in maintaining the cortical idle state to cancel a discrete action,  
516 whereas it would force the return to this idle state to stop a rhythmic movement. This explanation  
517 is also consistent with the notion that a discrete action, if controlled in an open-loop fashion, is  
518 not associated with an online control based on sensory prediction evaluation, as the PMBR is a  
519 correlate of the latter. In contrast, if controlled in a closed-loop fashion, the ongoing-rhythmic  
520 action requires the evaluation of the sensory predictions associated with the movement produc-  
521 tion, as indicated by a significant PMBR. A distinction in the movement-suppression after-effect  
522 (i.e., PMBR) suggests that discrete-action cancelling and rhythmic-action stopping may engage  
523 distinct inhibition processes <sup>43</sup>. As action inhibition operates on both discrete <sup>64,81</sup> and rhythmic <sup>4-</sup>  
524 <sup>6,42</sup> movements, considering the distinction between the two movement classes would undoubt-  
525 edly contribute to a better understanding of this complex process at the neurobiological level.

526           Alternatively, the lower Beta ERS following discrete action completion and cancellation  
527 compared to the large PMBR following rhythmic action stop, may reflect a PMBR that has been  
528 reduced due to the task uncertainty. Indeed, previous work suggested that beta power reflects  
529 the estimated uncertainty in the parameters of the forward models involved in motor control <sup>96</sup>.  
530 Thus, the primary stimuli (blue or green) in the discrete experiment required a two-choice reac-  
531 tion (i.e., trigger a discrete movement toward the left or right side), whereas the same stimuli  
532 required a unique response in the rhythmic experiment (i.e., continue the movement for both  
533 blue and green stimuli). This discrepancy may introduce a modulation of confidence in the pre-  
534 dicted sensory outcome in the forward model of action control, resulting in a lower post-move-  
535 ment Beta modulation <sup>54,96</sup>. In contrast, the rhythmicity of an ongoing movement may lead to a  
536 confident movement execution that increases the PMBR <sup>97</sup>.

537           Overall, our pattern of results regarding the Beta power dynamics excludes an under-  
538 standing of the PMBR neither as a correlate of the action sensory outcome evaluation nor as an  
539 index of active motor suppression. In fact, both interpretations are not incompatible, and a ten-  
540 tative explanation is that the PMBR reflects the action control in forward models, with its ampli-  
541 tude being modulated by the uncertainty and the engagement of an inhibition process. Thus, the  
542 PMBR could be reduced when the uncertainty of the predicted sensory output is high, whereas it

543 would be strengthened in reaction to an inhibition signal. This imperative action suppression  
544 might result in suppressing the motor plan execution and its predicted sensory outcome. It could  
545 also lead to the interruption of the closed-loop processing of sensorimotor information itself, as  
546 indicated by the Mu rebound that followed the rhythmic action stop. Although this explanation  
547 remains highly hypothetical without studies manipulating sensory feedback and inhibition re-  
548 quirement, it globally fits well with a recently established framework in which Beta rebounds re-  
549 flect, at various cortical sites, a "clearing-out" of the motor plan <sup>98</sup>.

550         The present study focused on the movement performance and suppression in reaction to  
551 an external cue, so-called exogenous action control <sup>99</sup>. Adapted behavior also includes performing  
552 and suppressing movement in a self-initiated fashion, that is, endogenous motor control. Gener-  
553 alizing the present functional interpretation of neural sensorimotor activities requires that future  
554 experiments study and contrast both situations. Especially, internal and external movement initi-  
555 ation require partially distinct sensorimotor activities <sup>100</sup>. Movement suppression mechanisms are  
556 also known to vary as a function of whether proactive vs. reactive inhibition is required, both for  
557 the suppression of discrete <sup>101,102</sup> and rhythmic <sup>6</sup> movements. These investigations are much  
558 needed to provide a complete comprehension of sensorimotor cortical activity.

559         The understanding of sensorimotor activity has implications for multiple clinical syn-  
560 dromes associated with movement disorders <sup>103</sup>. The abilities to initiate and stop action are espe-  
561 cially affected by impulsivity <sup>3</sup>, which is an essential dimension of several psychiatric disorders,  
562 such as attention deficit hyperactivity disorder (ADHD) and obsessive-compulsive disorder (OCD).  
563 Evaluating neural sensorimotor activity through movement-related cortical ERD/ERS, healthy par-  
564 ticipants have been distinguished from those with ADHD <sup>104</sup> and OCD <sup>105</sup>. In the general popula-  
565 tion, sensorimotor activity is poorly investigated in relation to individuals' impulsivity traits. A re-  
566 cent study suggested that sensorimotor ERD/ERS amplitude may relate to impulsivity <sup>106</sup>. The as-  
567 sociation reported in Appendix C. between motor impulsivity and lower LRP amplitude in trigger-  
568 ing a discrete action and higher PMBR when forced-stopping a rhythmic action suggests that cor-  
569 tical sensorimotor activity in the execution and suppression of action might depend on the indi-  
570 vidual's impulsivity level. Still, further studies targeting the impulsivity dimension and including  
571 participants exhibiting a broad range of impulsivity levels are required to test this hypothesis.

572           Finally, the present study provides new insights in understanding the cerebral sensorimo-  
573 tor activity by exploring EEG records of LRP and Mu/Beta rhythms associated with the perfor-  
574 mance and suppression of movement in the context of discrete and rhythmic classes of actions.  
575 Showing the distinct sensorimotor dynamics that operate in the two action classes, our findings  
576 are highly compatible with recent proposals that Mu and Beta rhythms might encode reciprocal  
577 interactions between motor and sensory cortices to enable movement monitoring<sup>47,96</sup>. Still, the  
578 PMBR may also reflect the engagement of a clearing-out function to abort the sensorimotor pro-  
579 cessing when action has to be inhibited<sup>14</sup>. At any rate, our findings support the notion that Mu  
580 and Beta frequency bands play complementary roles in the sensorimotor control of action. Fur-  
581 ther studies using imaging procedures with a better spatial resolution are required to disentangle  
582 the Mu and Beta specific implication in the different cortical areas that engage in action perfor-  
583 mance and suppression.

#### 584 **Data Availability**

585 The data generated during and/or analyzed during the current study are available from the cor-  
586 responding author upon reasonable request.



## 587 References

- 588 1. Riehle, A. & Vaadia, E. *Motor Cortex in Voluntary Movements: A Distributed System for*  
589 *Distributed Functions*. (CRC Press, 2004).
- 590 2. Hogan, N. & Sternad, D. On rhythmic and discrete movements: reflections, definitions  
591 and implications for motor control. *Exp. Brain Res.* **181**, 13–30 (2007).
- 592 3. Bari, A. & Robbins, T. W. Inhibition and impulsivity: behavioral and neural basis of  
593 response control. *Prog. Neurobiol.* **108**, 44–79 (2013).
- 594 4. Hervault, M., Huys, R., Farrer, C., Buisson, J. C. & Zanone, P. G. Cancelling discrete and  
595 stopping ongoing rhythmic movements: Do they involve the same process of motor  
596 inhibition? *Hum. Mov. Sci.* **64**, 296–306 (2019).
- 597 5. Lofredi, R. *et al.* Subthalamic stimulation impairs stopping of ongoing movements. *Brain*  
598 **144**, 44–52 (2021).
- 599 6. Schultz, K. E., Denning, D., Hufnagel, V. & Swann, N. Stopping a Continuous Movement:  
600 A Novel Approach to Investigating Motor Control. *bioRxiv* 2021.04.08.439070 (2021)  
601 doi:10.1101/2021.04.08.439070.
- 602 7. Sosnik, R., Chaim, E. & Flash, T. Stopping is not an option: the evolution of unstoppable  
603 motion elements (primitives). *J. Neurophysiol.* **114**, 846–856 (2015).
- 604 8. Alegre, M. *et al.* Frontal and central oscillatory changes related to different aspects of  
605 the motor process: a study in go/no-go paradigms. *Exp. Brain Res.* **159**, 14–22 (2004).
- 606 9. Leocani, L., Toro, C., Zhuang, P., Gerloff, C. & Hallett, M. Event-related  
607 desynchronization in reaction time paradigms: a comparison with event-related  
608 potentials and corticospinal excitability. *Clin. Neurophysiol. Off. J. Int. Fed. Clin.*  
609 *Neurophysiol.* **112**, 923–930 (2001).

- 610 10. Savostyanov, A. N. *et al.* EEG-correlates of trait anxiety in the stop-signal paradigm.  
611 *Neurosci. Lett.* **449**, 112–116 (2009).
- 612 11. Solis-Escalante, T., Müller-Putz, G. R., Pfurtscheller, G. & Neuper, C. Cue-induced beta  
613 rebound during withholding of overt and covert foot movement. *Clin. Neurophysiol. Off.*  
614 *J. Int. Fed. Clin. Neurophysiol.* **123**, 1182–1190 (2012).
- 615 12. Alegre, M., Alvarez-Gerriko, I., Valencia, M., Iriarte, J. & Artieda, J. Oscillatory changes  
616 related to the forced termination of a movement. *Clin. Neurophysiol.* **119**, 290–300  
617 (2008).
- 618 13. Alegre, M. *et al.* Alpha and beta oscillatory activity during a sequence of two  
619 movements. *Clin. Neurophysiol. Off. J. Int. Fed. Clin. Neurophysiol.* **115**, 124–130 (2004).
- 620 14. Heinrichs-Graham, E., Kurz, M. J., Gehringer, J. E. & Wilson, T. W. The functional role of  
621 post-movement beta oscillations in motor termination. *Brain Struct. Funct.* **222**, 3075–  
622 3086 (2017).
- 623 15. Pakenham, D. O. *et al.* Post-stimulus beta responses are modulated by task duration.  
624 *NeuroImage* **206**, 116288 (2020).
- 625 16. Guiard, Y. Fitts' law in the discrete vs. cyclical paradigm. *Hum. Mov. Sci.* **16**, 97–131  
626 (1997).
- 627 17. Huys, R., Studenka, B. E., Rheaume, N. L., Zelaznik, H. N. & Jirsa, V. K. Distinct Timing  
628 Mechanisms Produce Discrete and Continuous Movements. *PLoS Comput. Biol.* **4**,  
629 e1000061 (2008).
- 630 18. Huys, R., Studenka, B. E., Zelaznik, H. N. & Jirsa, V. K. Distinct timing mechanisms are  
631 implicated in distinct circle drawing tasks. *Neurosci. Lett.* **472**, 24–28 (2010).
- 632 19. Schaal, S., Sternad, D., Osu, R. & Kawato, M. Rhythmic arm movement is not discrete.  
633 *Nat. Neurosci.* **7**, 1136–1143 (2004).

- 634 20. Spencer, R. M. C., Zelaznik, H. N., Diedrichsen, J. & Ivry, R. B. Disrupted timing of  
635 discontinuous but not continuous movements by cerebellar lesions. *Science* **300**, 1437–  
636 1439 (2003).
- 637 21. Wiegel, P., Kurz, A. & Leukel, C. Evidence that distinct human primary motor cortex  
638 circuits control discrete and rhythmic movements. *J. Physiol.* **598**, 1235–1251 (2020).
- 639 22. Zelaznik, H. N. & Lantero, D. The role of vision in repetitive circle drawing. *Acta Psychol.*  
640 (*Amst.*) **92**, 105–118 (1996).
- 641 23. Jeannerod, M. *The neural and behavioural organization of goal-directed movements*. xii,  
642 283 (Clarendon Press/Oxford University Press, 1988).
- 643 24. Coles, M. G. H. Modern Mind-Brain Reading: Psychophysiology, Physiology, and  
644 Cognition. *Psychophysiology* **26**, 251–269 (1989).
- 645 25. Pfurtscheller, G. & Lopes da Silva, F. H. Event-related EEG/MEG synchronization and  
646 desynchronization: basic principles. *Clin. Neurophysiol.* **110**, 1842–1857 (1999).
- 647 26. Alegre, M. *et al.* Alpha and beta oscillatory changes during stimulus-induced movement  
648 paradigms: effect of stimulus predictability. *Neuroreport* **14**, 381–385 (2003).
- 649 27. Gaetz, W., Macdonald, M., Cheyne, D. & Snead, O. C. Neuromagnetic imaging of  
650 movement-related cortical oscillations in children and adults: age predicts post-  
651 movement beta rebound. *NeuroImage* **51**, 792–807 (2010).
- 652 28. McFarland, D. J., Miner, L. A., Vaughan, T. M. & Wolpaw, J. R. Mu and Beta Rhythm  
653 Topographies During Motor Imagery and Actual Movements. *Brain Topogr.* **12**, 177–186  
654 (2000).
- 655 29. Erbil, N. & Ungan, P. Changes in the alpha and beta amplitudes of the central EEG during  
656 the onset, continuation, and offset of long-duration repetitive hand movements. *Brain*  
657 *Res.* **1169**, 44–56 (2007).

- 658 30. Seeber, M., Scherer, R. & Müller-Putz, G. R. EEG Oscillations Are Modulated in Different  
659 Behavior-Related Networks during Rhythmic Finger Movements. *J. Neurosci.* **36**, 11671–  
660 11681 (2016).
- 661 31. Hermes, D. *et al.* Dissociation between Neuronal Activity in Sensorimotor Cortex and  
662 Hand Movement Revealed as a Function of Movement Rate. *J. Neurosci.* **32**, 9736–9744  
663 (2012).
- 664 32. Toma, K. *et al.* Movement Rate Effect on Activation and Functional Coupling of Motor  
665 Cortical Areas. *J. Neurophysiol.* **88**, 3377–3385 (2002).
- 666 33. De Jong, R., Coles, M. G. H., Logan, G. D. & Gratton, G. In search of the point of no  
667 return: the control of response processes. *J. Exp. Psychol. Hum. Percept. Perform.* **16**,  
668 164–182 (1990).
- 669 34. de Jong, R., Gladwin, T. E. & 't Hart, B. M. Movement-related EEG indices of preparation  
670 in task switching and motor control. *Brain Res.* **1105**, 73–82 (2006).
- 671 35. Smulders, F. T. Y. & Miller, J. O. *The Lateralized Readiness Potential*. (Oxford University  
672 Press, 2011). doi:10.1093/oxfordhb/9780195374148.013.0115.
- 673 36. Gratton, G., Coles, M. G., Sirevaag, E. J., Eriksen, C. W. & Donchin, E. Pre- and  
674 poststimulus activation of response channels: a psychophysiological analysis. *J. Exp.*  
675 *Psychol. Hum. Percept. Perform.* **14**, 331–344 (1988).
- 676 37. van Vugt, M. K., Simen, P., Nystrom, L., Holmes, P. & Cohen, J. D. Lateralized Readiness  
677 Potentials Reveal Properties of a Neural Mechanism for Implementing a Decision  
678 Threshold. *PLoS ONE* **9**, (2014).
- 679 38. De Jong, R., Coles, M. G. H. & Logan, G. D. Strategies and mechanisms in nonselective  
680 and selective inhibitory motor control. *J. Exp. Psychol. Hum. Percept. Perform.* **21**, 498–  
681 511 (1995).

- 682 39. Galdo-Alvarez, S., Bonilla, F. M., González-Villar, A. J. & Carrillo-de-la-Peña, M. T.  
683 Functional Equivalence of Imagined vs. Real Performance of an Inhibitory Task: An  
684 EEG/ERP Study. *Front. Hum. Neurosci.* **10**, (2016).
- 685 40. van Boxtel, G. J. M., van der Molen, M. W., Jennings, J. R. & Brunia, C. H. M. A  
686 psychophysiological analysis of inhibitory motor control in the stop-signal paradigm.  
687 *Biol. Psychol.* **58**, 229–262 (2001).
- 688 41. Wessel, J. R. Prepotent motor activity and inhibitory control demands in different  
689 variants of the go/no-go paradigm. *Psychophysiology* **55**, e12871 (2018).
- 690 42. Morein-Zamir, S., Chua, R., Franks, I., Nagelkerke, P. & Kingstone, A. Measuring online  
691 volitional response control with a continuous tracking task. *Behav. Res. Methods* **38**,  
692 638–647 (2006).
- 693 43. Hervault, M., Zanone, P.-G., Buisson, J.-C. & Huys, R. Hold your horses: Differences in  
694 EEG correlates of inhibition in cancelling and stopping an action. (2021)  
695 doi:10.31234/osf.io/ys9pd.
- 696 44. Neuper, C., Wörtz, M. & Pfurtscheller, G. ERD/ERS patterns reflecting sensorimotor  
697 activation and deactivation. in *Progress in Brain Research* vol. 159 211–222 (Elsevier,  
698 2006).
- 699 45. Pfurtscheller, G., Stancák, A. & Neuper, Ch. Event-related synchronization (ERS) in the  
700 alpha band — an electrophysiological correlate of cortical idling: A review. *Int. J.*  
701 *Psychophysiol.* **24**, 39–46 (1996).
- 702 46. Engel, A. K. & Fries, P. Beta-band oscillations—signalling the status quo? *Curr. Opin.*  
703 *Neurobiol.* **20**, 156–165 (2010).
- 704 47. Saltuklaroglu, T. *et al.* EEG mu rhythms: Rich sources of sensorimotor information in  
705 speech processing. *Brain Lang.* **187**, 41–61 (2018).

- 706 48. Wolpert, D. M., Ghahramani, Z. & Jordan, M. I. An internal model for sensorimotor  
707 integration. *Science* **269**, 1880–1882 (1995).
- 708 49. Pineda, J. A. The functional significance of mu rhythms: Translating “seeing” and  
709 “hearing” into “doing”. *Brain Res. Rev.* **50**, 57–68 (2005).
- 710 50. Hari, R. Action-perception connection and the cortical mu rhythm. *Prog. Brain Res.* **159**,  
711 253–260 (2006).
- 712 51. Sebastiani, V. *et al.* Being an agent or an observer: Different spectral dynamics revealed  
713 by MEG. *NeuroImage* **102**, 717–728 (2014).
- 714 52. Kilavik, B. E., Zaepffel, M., Brovelli, A., MacKay, W. A. & Riehle, A. The ups and downs of  
715 beta oscillations in sensorimotor cortex. *Exp. Neurol.* **245**, 15–26 (2013).
- 716 53. Torrecillos, F., Alayrangues, J., Kilavik, B. E. & Malfait, N. Distinct Modulations in  
717 Sensorimotor Postmovement and Foreperiod  $\beta$ -Band Activities Related to Error Salience  
718 Processing and Sensorimotor Adaptation. *J. Neurosci. Off. J. Soc. Neurosci.* **35**, 12753–  
719 12765 (2015).
- 720 54. Tzagarakis, C., Ince, N. F., Leuthold, A. C. & Pellizzer, G. Beta-band activity during motor  
721 planning reflects response uncertainty. *J. Neurosci. Off. J. Soc. Neurosci.* **30**, 11270–  
722 11277 (2010).
- 723 55. Cassim, F. *et al.* Does post-movement beta synchronization reflect an idling motor  
724 cortex? *Neuroreport* **12**, 3859–3863 (2001).
- 725 56. Alegre, M. *et al.* Beta electroencephalograph changes during passive movements:  
726 sensory afferences contribute to beta event-related desynchronization in humans.  
727 *Neurosci. Lett.* **331**, 29–32 (2002).
- 728 57. Houdayer, E., Labyt, E., Cassim, F., Bourriez, J. L. & Derambure, P. Relationship between  
729 event-related beta synchronization and afferent inputs: analysis of finger movement

- 730 and peripheral nerve stimulations. *Clin. Neurophysiol. Off. J. Int. Fed. Clin. Neurophysiol.*  
731 **117**, 628–636 (2006).
- 732 58. Salmelin, R., Hämäläinen, M., Kajola, M. & Hari, R. Functional segregation of movement-  
733 related rhythmic activity in the human brain. *NeuroImage* **2**, 237–243 (1995).
- 734 59. Parkes, L. M., Bastiaansen, M. C. M. & Norris, D. G. Combining EEG and fMRI to  
735 investigate the post-movement beta rebound. *NeuroImage* **29**, 685–696 (2006).
- 736 60. Elie, D., Desmyttere, G., Mathieu, E., Tallet, J. & Cremoux, S. Magnitude of the post-  
737 movement beta synchronization correlates with the variability of the ankle torque  
738 production. *Neurophysiol. Clin.* **48**, 226–227 (2018).
- 739 61. Fry, A. *et al.* Modulation of post-movement beta rebound by contraction force and rate  
740 of force development. *Hum. Brain Mapp.* **37**, 2493–2511 (2016).
- 741 62. Cheyne, D. O. MEG studies of sensorimotor rhythms: A review. *Exp. Neurol.* **245**, 27–39  
742 (2013).
- 743 63. Oldfield, R. C. The assessment and analysis of handedness: The Edinburgh inventory.  
744 *Neuropsychologia* **9**, 97–113 (1971).
- 745 64. Verbruggen, F. *et al.* A consensus guide to capturing the ability to inhibit actions and  
746 impulsive behaviors in the stop-signal task. *eLife* **8**, e46323 (2019).
- 747 65. Trans Cranial Technologies. 10/20 System Positioning Manual. (2012).
- 748 66. Delorme, A. & Makeig, S. EEGLAB: an open source toolbox for analysis of single-trial EEG  
749 dynamics including independent component analysis. *J. Neurosci. Methods* **134**, 9–21  
750 (2004).
- 751 67. Bell, A. J. & Sejnowski, T. J. An information-maximization approach to blind separation  
752 and blind deconvolution. *Neural Comput.* **7**, 1129–1159 (1995).

- 753 68. Pion-Tonachini, L., Kreutz-Delgado, K. & Makeig, S. ICLabel: An automated  
754 electroencephalographic independent component classifier, dataset, and website.  
755 *NeuroImage* **198**, 181–197 (2019).
- 756 69. Verbruggen, F. & Logan, G. D. Models of response inhibition in the stop-signal and stop-  
757 change paradigms. *Neurosci. Biobehav. Rev.* **33**, 647–661 (2009).
- 758 70. Neuper, C. & Pfurtscheller, G. Event-related dynamics of cortical rhythms: frequency-  
759 specific features and functional correlates. *Int. J. Psychophysiol. Off. J. Int. Organ.*  
760 *Psychophysiol.* **43**, 41–58 (2001).
- 761 71. Zaepffel, M., Trachel, R., Kilavik, B. E. & Brochier, T. Modulations of EEG Beta Power  
762 during Planning and Execution of Grasping Movements. *PLOS ONE* **8**, e60060 (2013).
- 763 72. Jonmohamadi, Y. & Muthukumaraswamy, S. D. Multi-band component analysis for EEG  
764 artifact removal and source reconstruction with application to gamma-band activity.  
765 *Biomed. Phys. Eng. Express* **4**, 035007 (2018).
- 766 73. Delorme, A., Palmer, J., Onton, J., Oostenveld, R. & Makeig, S. Independent EEG Sources  
767 Are Dipolar. *PLOS ONE* **7**, e30135 (2012).
- 768 74. Oostenveld, R. & Oostendorp, T. F. Validating the boundary element method for  
769 forward and inverse EEG computations in the presence of a hole in the skull. *Hum. Brain*  
770 *Mapp.* **17**, 179–192 (2002).
- 771 75. Pascual-Marqui, R. D. Standardized low-resolution brain electromagnetic tomography  
772 (sLORETA): technical details. *Methods Find. Exp. Clin. Pharmacol.* **24 Suppl D**, 5–12  
773 (2002).
- 774 76. Marco-Pallarés, J., Grau, C. & Ruffini, G. Combined ICA-LORETA analysis of mismatch  
775 negativity. *NeuroImage* **25**, 471–477 (2005).



- 776 77. Sekihara, K., Sahani, M. & Nagarajan, S. S. Localization bias and spatial resolution of  
777 adaptive and non-adaptive spatial filters for MEG source reconstruction. *NeuroImage*  
778 **25**, 1056–1067 (2005).
- 779 78. Fuchs, M., Kastner, J., Wagner, M., Hawes, S. & Ebersole, J. S. A standardized boundary  
780 element method volume conductor model. *Clin. Neurophysiol. Off. J. Int. Fed. Clin.*  
781 *Neurophysiol.* **113**, 702–712 (2002).
- 782 79. Maris, E. & Oostenveld, R. Nonparametric statistical testing of EEG- and MEG-data. *J.*  
783 *Neurosci. Methods* **164**, 177–190 (2007).
- 784 80. Cohen, M. X. *Analyzing Neural Time Series Data – Theory and Practice*. (MIT Press,  
785 2014).
- 786 81. Boucher, L., Stuphorn, V., Logan, G. D., Schall, J. D. & Palmeri, T. J. Stopping eye and  
787 hand movements: Are the processes independent? *Percept. Psychophys.* **69**, 785–801  
788 (2007).
- 789 82. Kok, A., Ramautar, J. R., De Ruiter, M. B., Band, G. P. H. & Ridderinkhof, K. R. ERP  
790 components associated with successful and unsuccessful stopping in a stop-signal task.  
791 *Psychophysiology* **41**, 9–20 (2004).
- 792 83. Krämer, U. M., Knight, R. T. & Münte, T. F. Electrophysiological evidence for different  
793 inhibitory mechanisms when stopping or changing a planned response. *J. Cogn.*  
794 *Neurosci.* **23**, 2481–2493 (2011).
- 795 84. Montanari, R., Giamundo, M., Brunamonti, E., Ferraina, S. & Pani, P. Visual salience of  
796 the stop-signal affects movement suppression process. *Exp. Brain Res.* **235**, 2203–2214  
797 (2017).
- 798 85. Band, G. P. & van Boxtel, G. J. Inhibitory motor control in stop paradigms: review and  
799 reinterpretation of neural mechanisms. *Acta Psychol. (Amst.)* **101**, 179–211 (1999).

- 800 86. Wessel, J. R. & Aron, A. R. On the Globality of Motor Suppression: Unexpected Events  
801 and Their Influence on Behavior and Cognition. *Neuron* **93**, 259–280 (2017).
- 802 87. Tatz, J. R., Soh, C. & Wessel, J. R. Towards a two-stage model of action-stopping:  
803 Attentional capture explains motor inhibition during early stop-signal processing.  
804 *bioRxiv* 2021.02.26.433098 (2021) doi:10.1101/2021.02.26.433098.
- 805 88. Diesburg, D. A. & Wessel, J. R. The Pause-then-Cancel model of human action-stopping:  
806 Theoretical considerations and empirical evidence. *Neurosci. Biobehav. Rev.* **129**, 17–34  
807 (2021).
- 808 89. Jones, S. R. *et al.* Cued Spatial Attention Drives Functionally Relevant Modulation of the  
809 Mu Rhythm in Primary Somatosensory Cortex. *J. Neurosci.* **30**, 13760–13765 (2010).
- 810 90. Tan, H., Jenkinson, N. & Brown, P. Dynamic neural correlates of motor error monitoring  
811 and adaptation during trial-to-trial learning. *J. Neurosci. Off. J. Soc. Neurosci.* **34**, 5678–  
812 5688 (2014).
- 813 91. Alayrangues, J., Torrecillos, F., Jahani, A. & Malfait, N. Error-related modulations of the  
814 sensorimotor post-movement and foreperiod beta-band activities arise from distinct  
815 neural substrates and do not reflect efferent signal processing. *NeuroImage* **184**, 10–24  
816 (2019).
- 817 92. Jurkiewicz, M. T., Gaetz, W. C., Bostan, A. C. & Cheyne, D. Post-movement beta rebound  
818 is generated in motor cortex: evidence from neuromagnetic recordings. *NeuroImage* **32**,  
819 1281–1289 (2006).
- 820 93. Pfurtscheller, G., Stancák, A. & Neuper, C. Post-movement beta synchronization. A  
821 correlate of an idling motor area? *Electroencephalogr. Clin. Neurophysiol.* **98**, 281–293  
822 (1996).

- 823 94. Brovelli, A., Battaglini, P. P., Naranjo, J. R. & Budai, R. Medium-Range Oscillatory  
824 Network and the 20-Hz Sensorimotor Induced Potential. *NeuroImage* **16**, 130–141  
825 (2002).
- 826 95. Koelewijn, T., van Schie, H. T., Bekkering, H., Oostenveld, R. & Jensen, O. Motor-cortical  
827 beta oscillations are modulated by correctness of observed action. *NeuroImage* **40**, 767–  
828 775 (2008).
- 829 96. Palmer, C., Zapparoli, L. & Kilner, J. M. A New Framework to Explain Sensorimotor Beta  
830 Oscillations. *Trends Cogn. Sci.* **20**, 321–323 (2016).
- 831 97. Fischer, P., Tan, H., Pogosyan, A. & Brown, P. High post-movement parietal low-beta  
832 power during rhythmic tapping facilitates performance in a stop task. *Eur. J. Neurosci.*  
833 **44**, 2202–2213 (2016).
- 834 98. Schmidt, R. *et al.* Beta Oscillations in Working Memory, Executive Control of Movement  
835 and Thought, and Sensorimotor Function. *J. Neurosci.* **39**, 8231–8238 (2019).
- 836 99. Pfister, R., Heinemann, A., Kiesel, A., Thomaschke, R. & Janczyk, M. Do endogenous and  
837 exogenous action control compete for perception? *J. Exp. Psychol. Hum. Percept.*  
838 *Perform.* **38**, 279–284 (2012).
- 839 100. Hoffstaedter, F., Grefkes, C., Zilles, K. & Eickhoff, S. B. The “What” and “When” of Self-  
840 Initiated Movements. *Cereb. Cortex N. Y. NY* **23**, 520–530 (2013).
- 841 101. Aron, A. R. From reactive to proactive and selective control: developing a richer model  
842 for stopping inappropriate responses. *Biol. Psychiatry* **69**, e55-68 (2011).
- 843 102. Verbruggen, F. & Logan, G. D. Proactive adjustments of response strategies in the stop-  
844 signal paradigm. *J. Exp. Psychol. Hum. Percept. Perform.* **35**, 835–854 (2009).
- 845 103. Shibasaki, H. Cortical activities associated with voluntary movements and involuntary  
846 movements. *Clin. Neurophysiol.* **123**, 229–243 (2012).

- 847 104. Dockstader, C. *et al.* MEG event-related desynchronization and synchronization deficits  
848 during basic somatosensory processing in individuals with ADHD. *Behav. Brain Funct.*  
849 *BBF* **4**, 8 (2008).
- 850 105. Leocani, L. *et al.* Abnormal pattern of cortical activation associated with voluntary  
851 movement in obsessive-compulsive disorder: an EEG study. *Am. J. Psychiatry* **158**, 140–  
852 142 (2001).
- 853 106. Tzagarakis, C., Thompson, A., Rogers, R. D. & Pellizzer, G. The Degree of Modulation of  
854 Beta Band Activity During Motor Planning Is Related to Trait Impulsivity. *Front. Integr.*  
855 *Neurosci.* **13**, (2019).
- 856 107. Sallard, E., Tallet, J., Thut, G., Deiber, M.-P. & Barral, J. Post-switching beta  
857 synchronization reveals concomitant sensory reafferences and active inhibition  
858 processes. *Behav. Brain Res.* **271**, 365–373 (2014).
- 859
